# Supplementary material for: Structurally well-characterized new multinuclear Cu(ii) and Zn(ii) clusters: X-ray crystallography, theoretical studies, and applications in catalysis
Source: Royal Society of Chemistry journal article supplement (doi:10.1039/c6nj02150f), 2016-01-01
Supplement: c6nj02150f1.pdf [file c6nj02150f1.pdf]

Supporting Information

**Structurally well-characterized new multinuclear Cu(II) and Zn(II) clusters: X-ray crystallography, theoretical studies, and applications in catalysis**

Istikhar A. Ansari<sup>a</sup>, Farasha Sama<sup>a</sup>, Mukul Raizada<sup>a</sup>, M. Shahid<sup>a</sup>, Musheer Ahmad<sup>b</sup>, Zafar A.

Siddiqi<sup>a\*</sup>

---

<sup>a</sup>*Department of Chemistry, Aligarh Muslim University, Aligarh-202002, India*

<sup>b</sup>*Department of Applied Chemistry, Aligarh Muslim University, Aligarh-202002, India*

\*corresponding author, E-mail: zafarasiddiqi@gmail.com, Ph. +91 9411803461

**Table S1.** Crystal data with refinement parameters for **1** and **2**.

| Parameters                     | <b>1</b>                                                                       | <b>2</b>                                                         |
|--------------------------------|--------------------------------------------------------------------------------|------------------------------------------------------------------|
| Empirical formula              | C <sub>26</sub> H <sub>38</sub> Cu <sub>3</sub> N <sub>4</sub> O <sub>16</sub> | C <sub>27</sub> H <sub>31</sub> Zn <sub>2</sub> NO <sub>10</sub> |
| Formula weight                 | 853.22                                                                         | 660.27                                                           |
| Temp (K)                       | 296(2)                                                                         | 296(2)                                                           |
| Crystal system                 | Monoclinic                                                                     | Monoclinic                                                       |
| Space group                    | P 2 <sub>1</sub> /c                                                            | P 2 <sub>1</sub> /n                                              |
| Unit cell dimensions           |                                                                                |                                                                  |
| a (Å)                          | 8.1872(6)                                                                      | 14.49(4)                                                         |
| b (Å)                          | 16.9482(13)                                                                    | 11.44(3)                                                         |
| c (Å)                          | 11.7093(9)                                                                     | 18.17(5)                                                         |
| α (°)                          | 90                                                                             | 90                                                               |
| β (°)                          | 101.284(4)                                                                     | 109.49(5)                                                        |
| γ (°)                          | 90                                                                             | 90                                                               |
| V (Å <sup>3</sup> )            | 1593.4(2)                                                                      | 2839(14)                                                         |
| Z                              | 2                                                                              | 4                                                                |
| ρ (calc) (g cm <sup>-3</sup> ) | 1.778                                                                          | 1.545                                                            |
| F (000)                        | 874                                                                            | 1360                                                             |
| Index ranges                   | -9 ≤ h ≤ 9<br>-20 ≤ k ≤ 19<br>-14 ≤ l ≤ 14                                     | -17 ≤ h ≤ 17<br>-13 ≤ k ≤ 13<br>-21 ≤ l ≤ 21                     |
| No of reflections collected    | 17858                                                                          | 34548                                                            |
| No. of independent reflection  | 2404                                                                           | 3220                                                             |
| GOF                            | 1.035                                                                          | 1.039                                                            |
| Final R indices [ I > 2σ(I) ]  | R <sub>1</sub> = 0.0310<br>wR <sub>2</sub> = 0.0791                            | 0.0407<br>0.0785                                                 |
| R indices all data             | R <sub>2</sub> = 0.0417<br>wR <sub>2</sub> = 0.0843                            | 0.0791<br>0.0898                                                 |

**Table S2.** Selected bond lengths (Å) and bond angles (°) of **1** and **2**.

| <b>1</b>     |            | <b>2</b>  |            |
|--------------|------------|-----------|------------|
| Bond lengths |            |           |            |
| Cu1–O1       | 1.911(2)   | Zn1–O3    | 2.124(5)   |
| Cu1–O4       | 1.959(2)   | Zn1–O5    | 1.988(5)   |
| Cu1–N1       | 2.019(2)   | Zn1–N1    | 2.140(5)   |
| Cu1–O3       | 2.067(2)   | Zn1–O8    | 2.078(4)   |
| Cu1–O5       | 2.239(3)   | Zn1–O7    | 2.172(6)   |
| Cu2–O4       | 1.938(2)   | Zn2–O8    | 1.941(5)   |
| Cu2–O2       | 1.994(2)   | Zn2–O1    | 1.926(5)   |
| Cu2–O2       | 1.9933(19) | Zn2–O4    | 1.960(4)   |
| Cu1–O1       | 1.9099(19) | Zn2–O6    | 1.959(6)   |
| Bond angles  |            |           |            |
| O1–Cu1–O4    | 97.42(9)   | O5–Zn1–O3 | 97.11(11)  |
| O1–Cu1–N1    | 173.90(10) | N1–Zn1–O3 | 97.10(12)  |
| O4–Cu1–N1    | 88.63(9)   | N1–Zn1–O5 | 165.68(12) |
| O1–Cu1–O3    | 90.53(10)  | O8–Zn1–O3 | 92.65(10)  |
| O4–Cu1–O3    | 157.57(10) | O8–Zn1–O5 | 95.60(10)  |
| N1–Cu1–O3    | 83.57(9)   | O8–Zn1–N1 | 82.02(11)  |
| O1–Cu1–O5    | 99.17(11)  | O7–Zn1–O3 | 81.56(11)  |
| O4–Cu1–O5    | 99.77(10)  | O7–Zn1–O5 | 102.80(11) |
| N1–Cu1–O5    | 80.38(10)  | O7–Zn1–N1 | 81.02(12)  |
| O3–Cu1–O5    | 99.61(11)  | O7–Zn1–O8 | 161.24(11) |
| O4–Cu2–O4    | 180.00(5)  | O9–Zn1–O3 | 167.84(12) |
| O4–Cu2–O2    | 91.82(9)   | O9–Zn1–O5 | 88.36(13)  |
| O4–Cu2–O2    | 88.18(9)   | O9–Zn1–N1 | 78.02(14)  |
| O4–Cu2–O2    | 88.18(9)   | O9–Zn1–O8 | 97.63(12)  |
| O4–Cu2–O2    | 91.82(9)   | O9–Zn1–O7 | 86.65(13)  |
| O2–Cu2–O2    | 180.0      | O4–Zn2–O1 | 99.85(11)  |
| C1–O1–Cu1    | 127.3(2)   | O6–Zn2–O1 | 112.45(13) |
| N1–C12–C13   | 112.8(2)   | O6–Zn2–O4 | 111.85(12) |
| N1–C10–C11   | 109.7(2)   | O8–Zn2–O1 | 120.92(11) |
| N1–C8–C9     | 109.4(2)   | O8–Zn2–O4 | 107.99(11) |
| Cu1–Cu2–Cu1  | 180.0      | O8–Zn2–O6 | 103.83(12) |

**Table S3.** Characterization data for catalysts (**1** and **2**) recovered after catalytic reactions.

| catalyst | Analytical data                                                                                                                                                                                                                 | FTIR spectra                                                     |
|----------|---------------------------------------------------------------------------------------------------------------------------------------------------------------------------------------------------------------------------------|------------------------------------------------------------------|
| (1)      | Elemental analysis for $C_{26}H_{34}Cu_3N_4O_{16}$ ( $M = 795$ ): C, 36.74; N, 6.59; H, 4.00%.<br>Found: C, 36.88; N, 6.71; H, 4.16%. Molar conductance, $\Lambda_m$ ( $10^{-3}$ M, methanol): 39.0 $\Omega^{-1}cm^2mol^{-1}$ . | 1567/1382s $v_{as}/v_s(COO^-)$ ,<br>3410 (O–H), 942s (Cu–O–Cu).  |
| (2)      | Elemental analysis for $C_{27}H_{31}NO_{10}Zn_2$ ( $M = 660$ ): C, 49.10; N, 2.12; H, 4.69%.<br>Found: C, 49.74; N, 2.31; H, 4.49%. Molar conductance, $\Lambda_m$ ( $10^{-3}$ M, methanol): 48.0 $\Omega^{-1}cm^2mol^{-1}$ .   | 1555/1380s $v_{as}/v_s(COO^-)$ ,<br>3435w (O–H), 936s (Zn–O–Zn). |

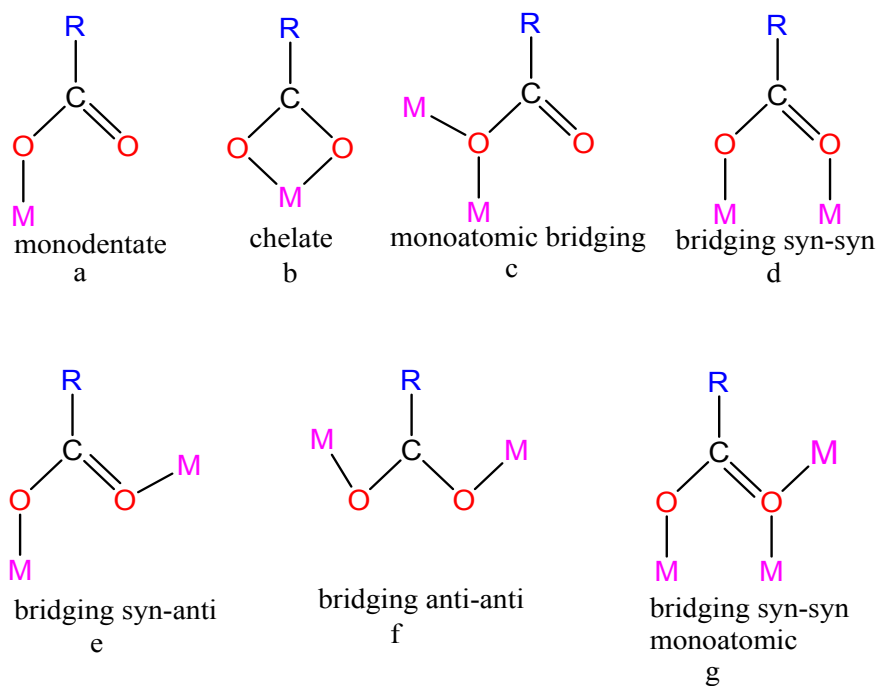**Scheme S1.** Selected coordination modes of carboxylate ( $COO^-$ ) group.

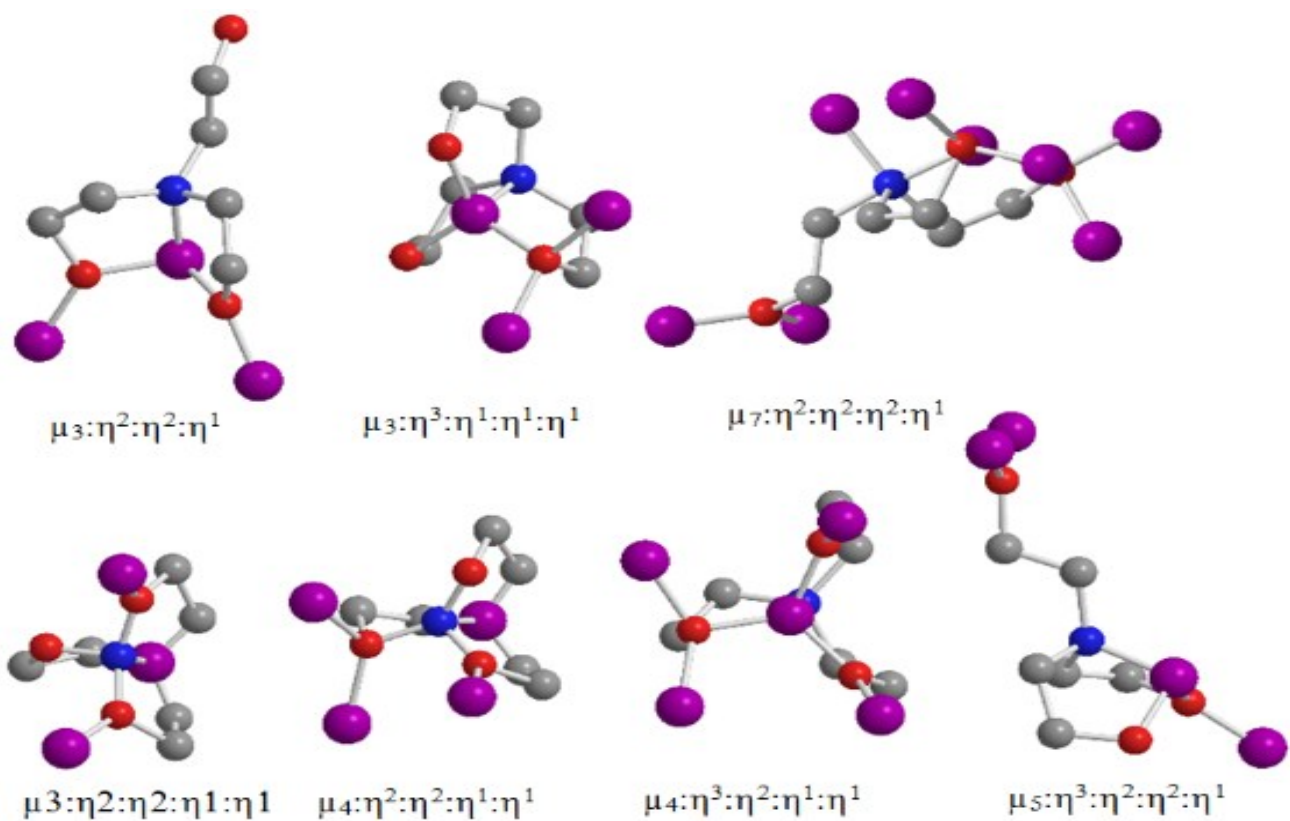

**Scheme S2.** Coordination modes of the ligand triethanolamine ( $H_3tea$ ). Metals ions are purple, oxygen atoms red, nitrogen atom blue and carbon atoms grey. (H atoms are not shown for clarity).

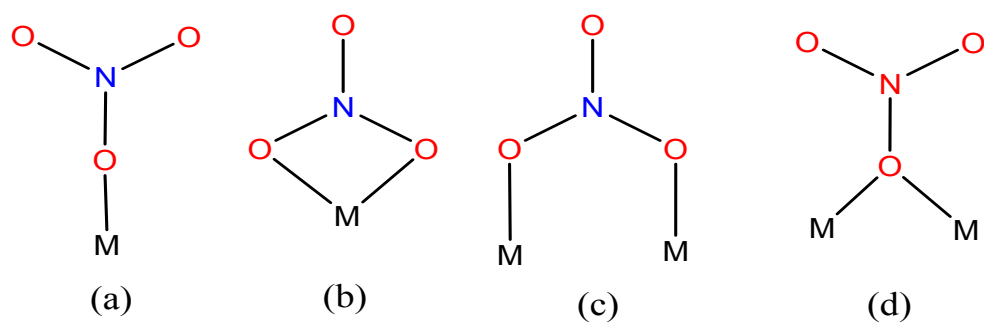

**Scheme S3.** Selected coordination modes of nitrate ( $NO_3^-$ ) group.

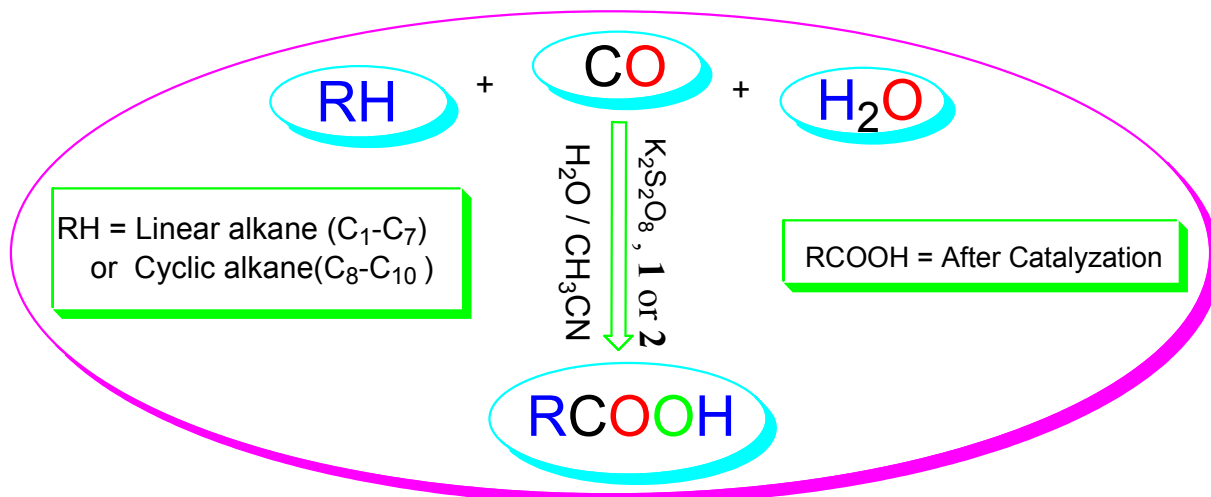

**Scheme S4.** Hydrocarboxylation of alkanes to carboxylic acids catalyzed by **1** and **2**.

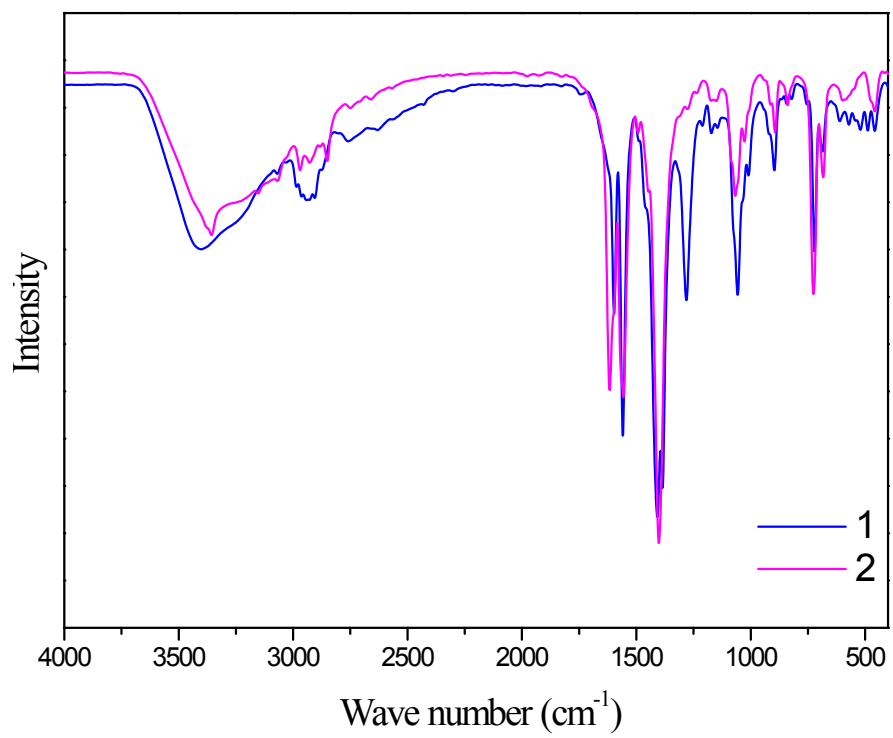

**Fig. S1** FTIR spectra for the complexes (1 and 2).

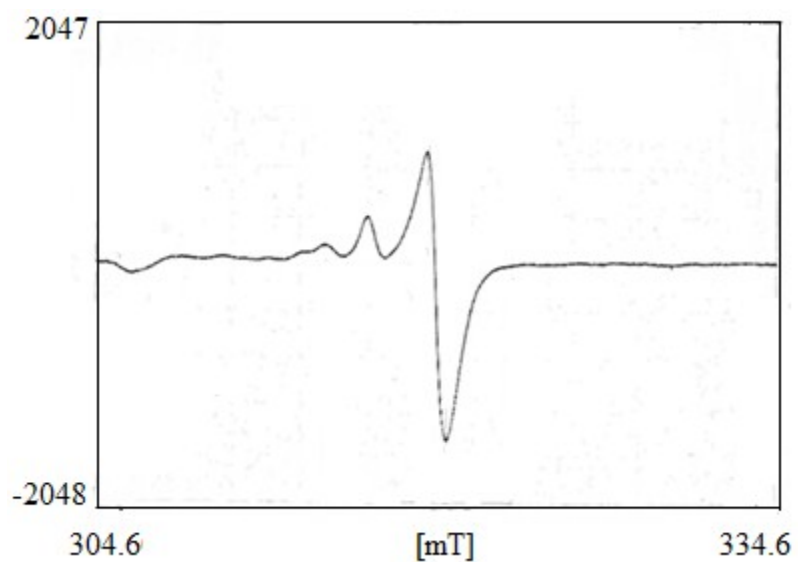

Fig. S2: EPR spectrum of 1.

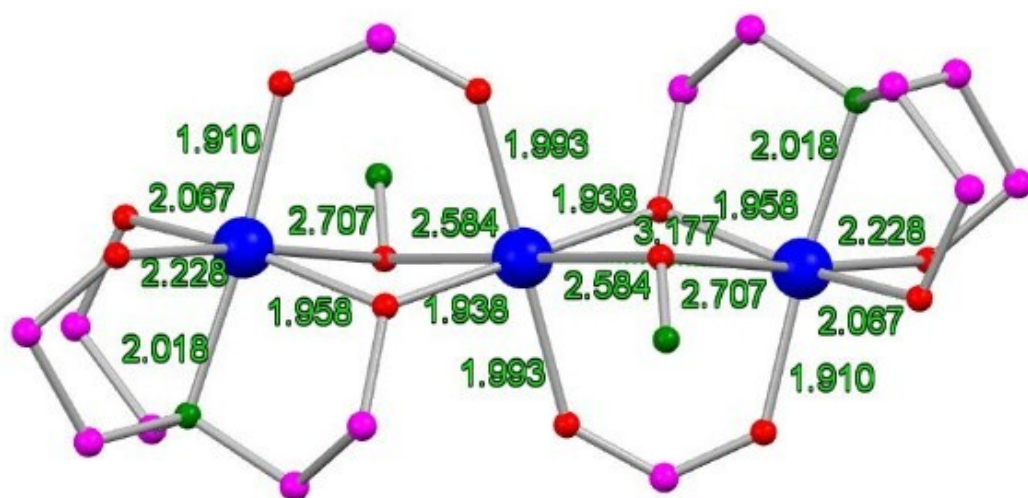

Fig. S3 (a): Molecular core of 1 with bond lengths.



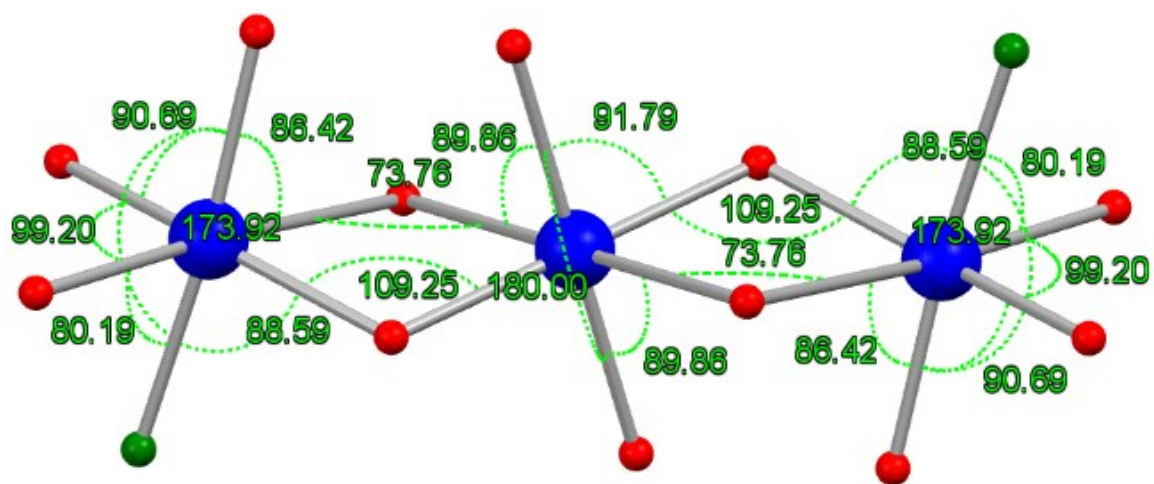

Fig. S3 (b): Molecular core of 1 with bond angles.

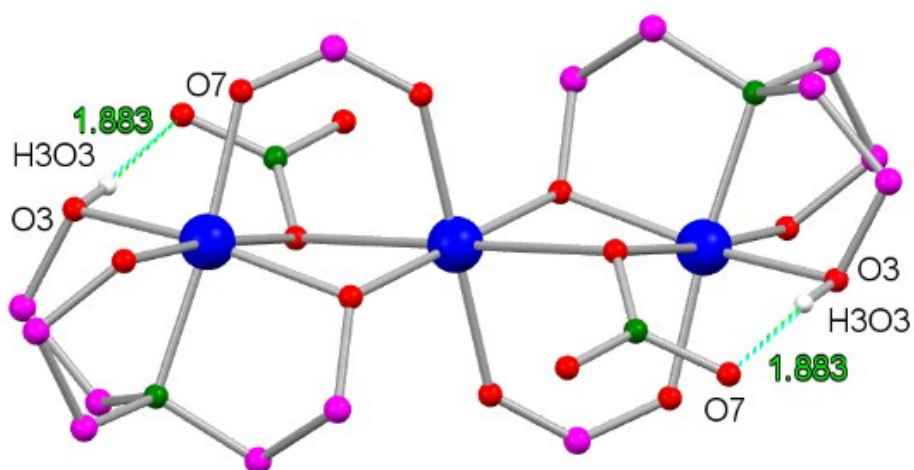

Fig. S4. Intramolecular O-H...O interactions in 1.

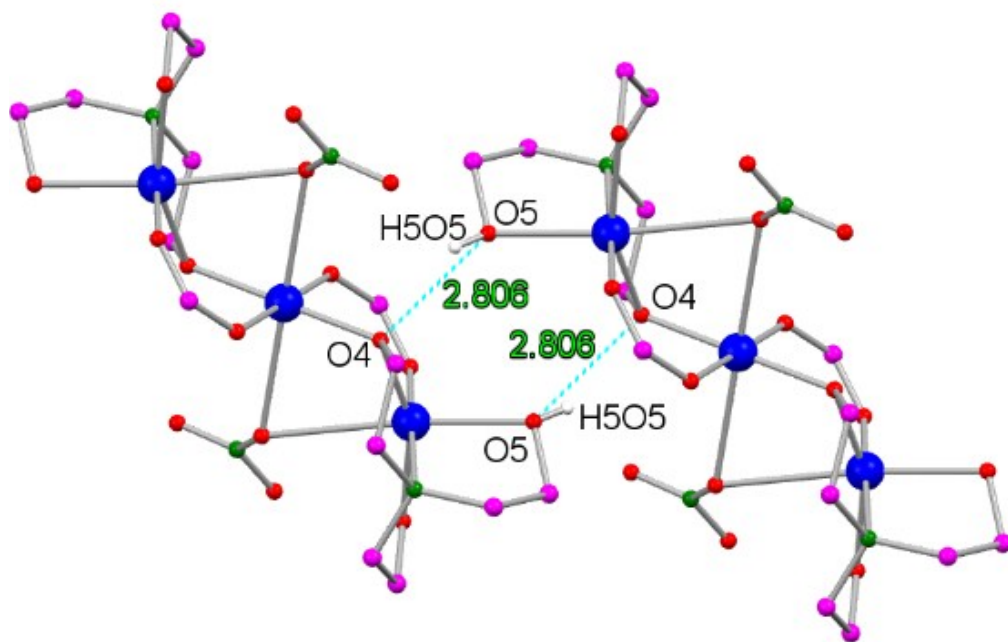

**Fig. S5.** Intermolecular O–H⋯O interactions in **1**.

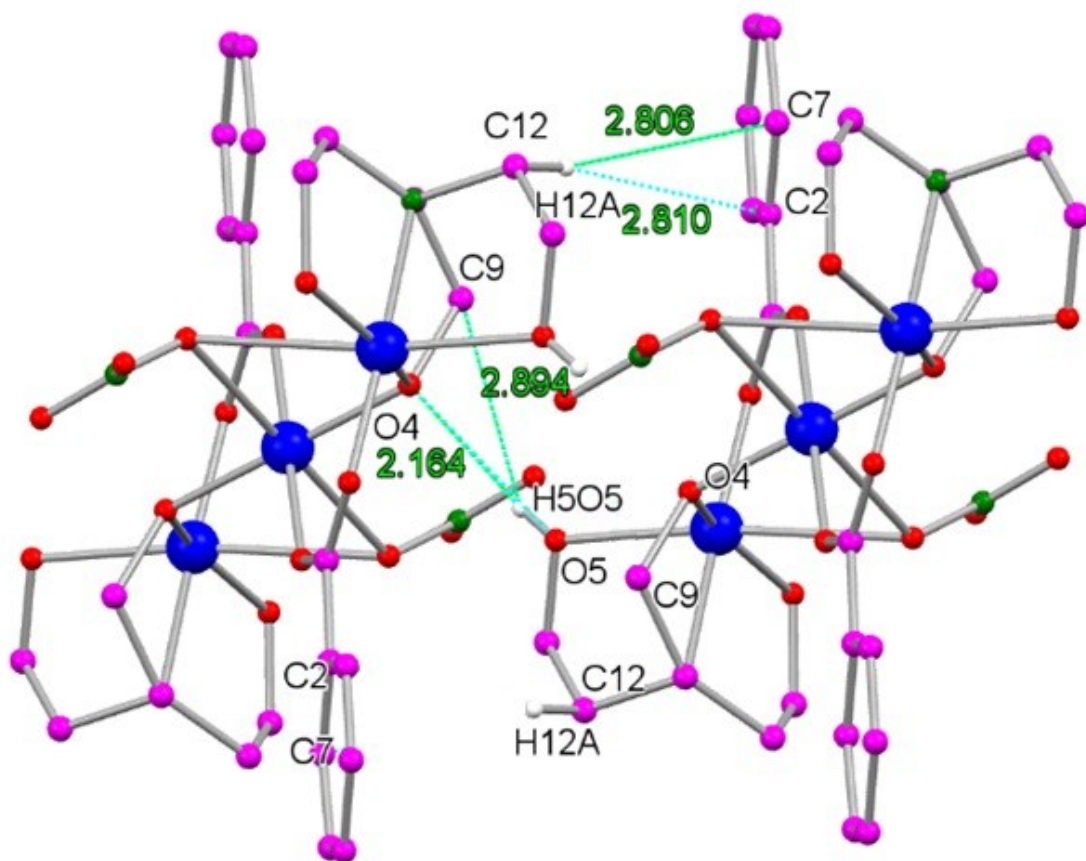

**Fig. S6.** C-H... $\pi$  and O-H...O interactions in **1**.

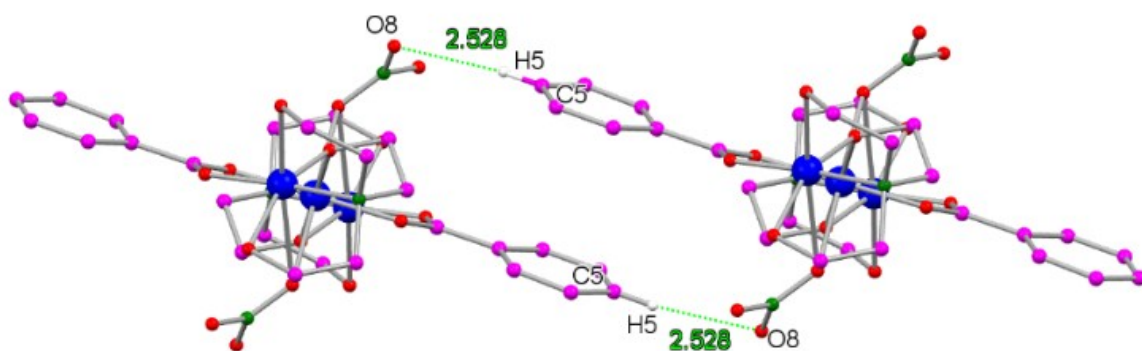

**Fig. S7.** C-H...C interactions in **1**.

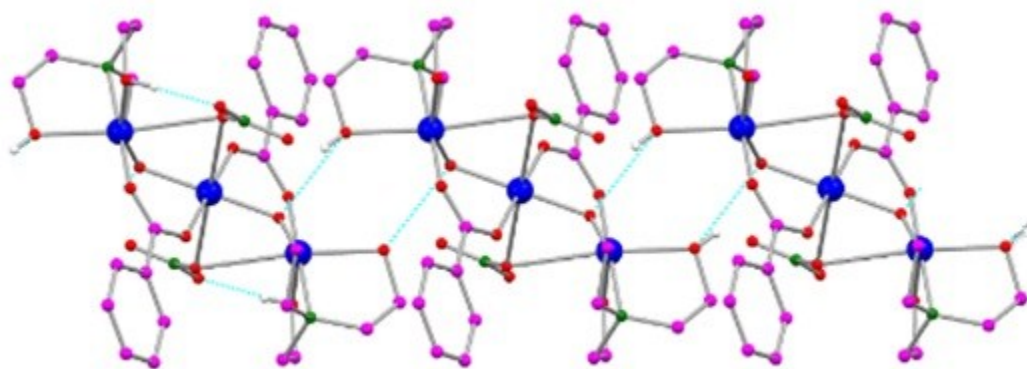

**Fig. S8.1** D polymer chain formed by non-covalent interactions in **1**.

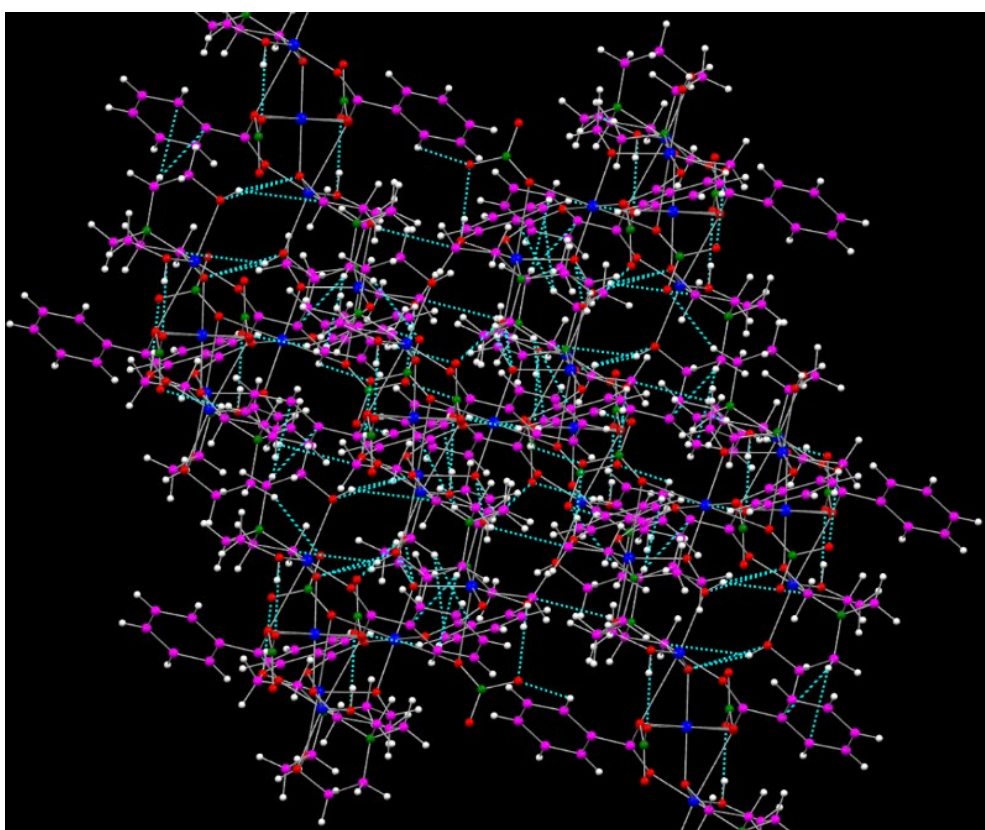

**Fig. S9.** 3 D supra molecular network of **1**.

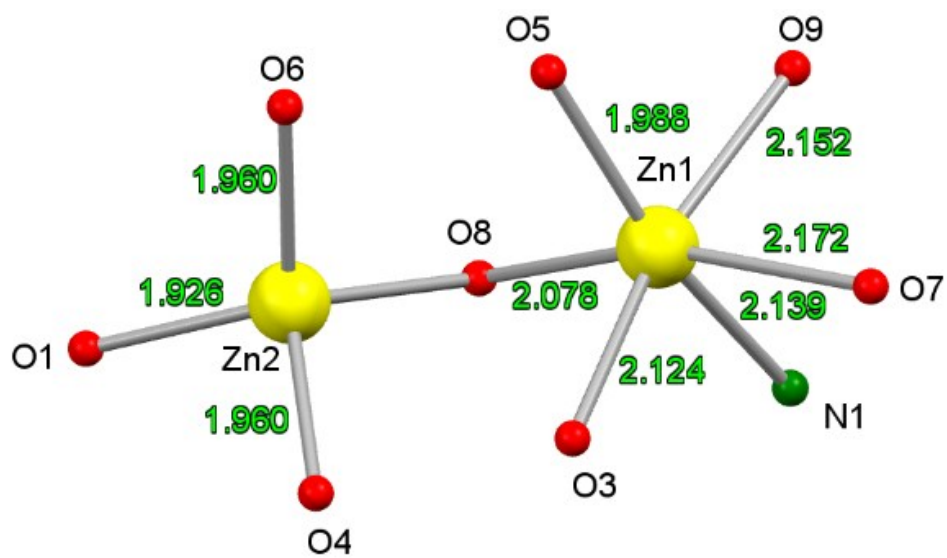

Fig. S10 (a): Molecular core of 2 with bond lengths.

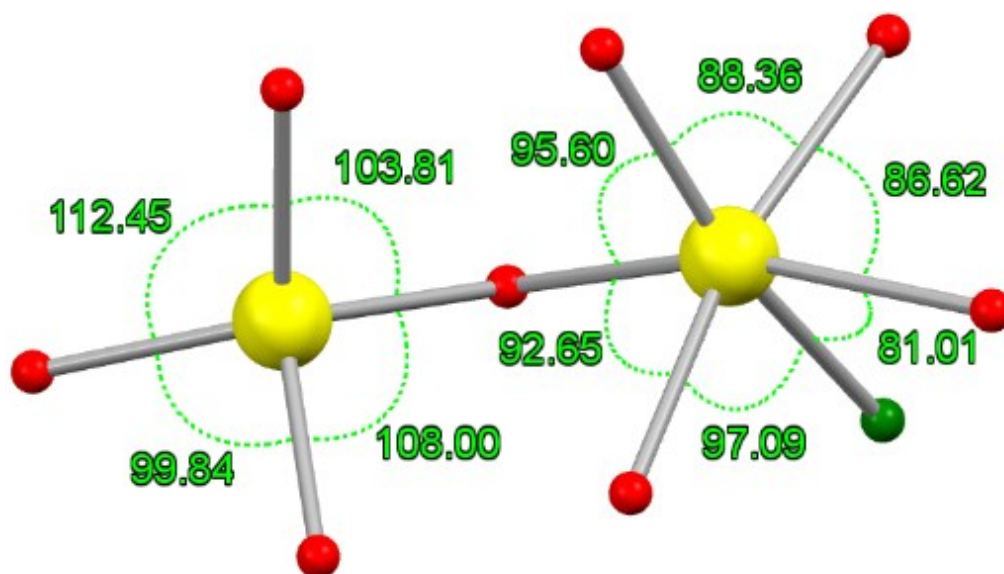

Fig. S10(b): Molecular core of 2 with bond angles.

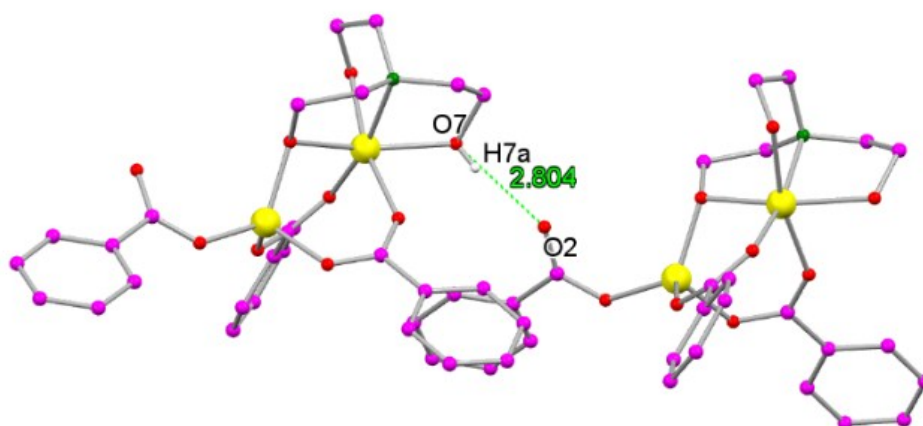

**Fig. S11.** Intramolecular O-H...O interactions in **2**.

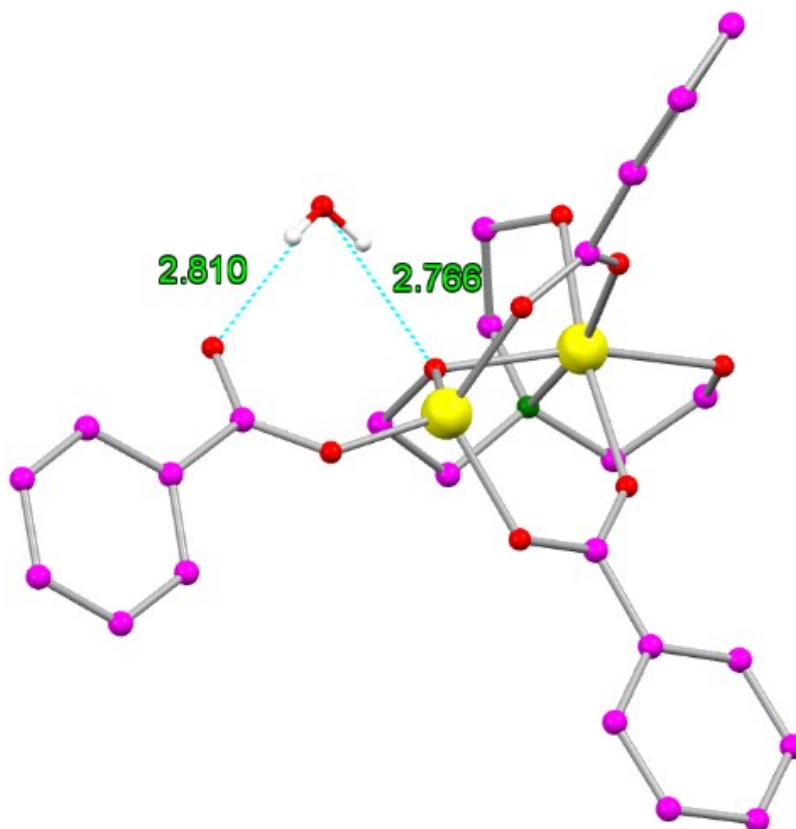

**Fig. S12.** Intermolecular O-H...O interactions in **2**.

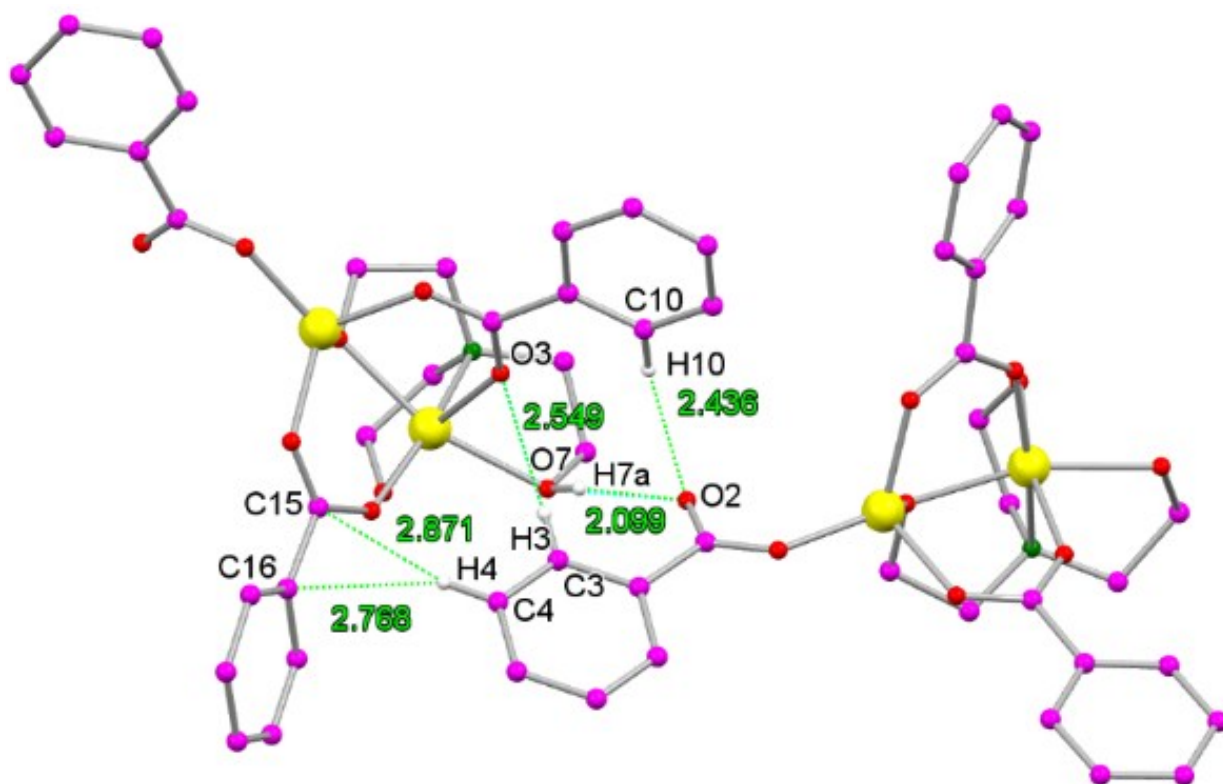

Fig. S13. C-H...C interactions in 2.

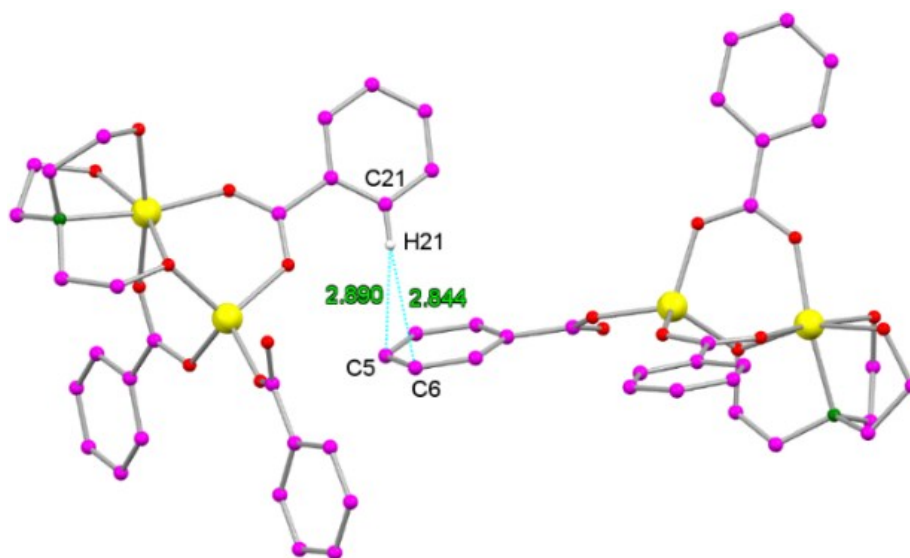

Fig. S14. C-H... $\pi$  interactions in 2.

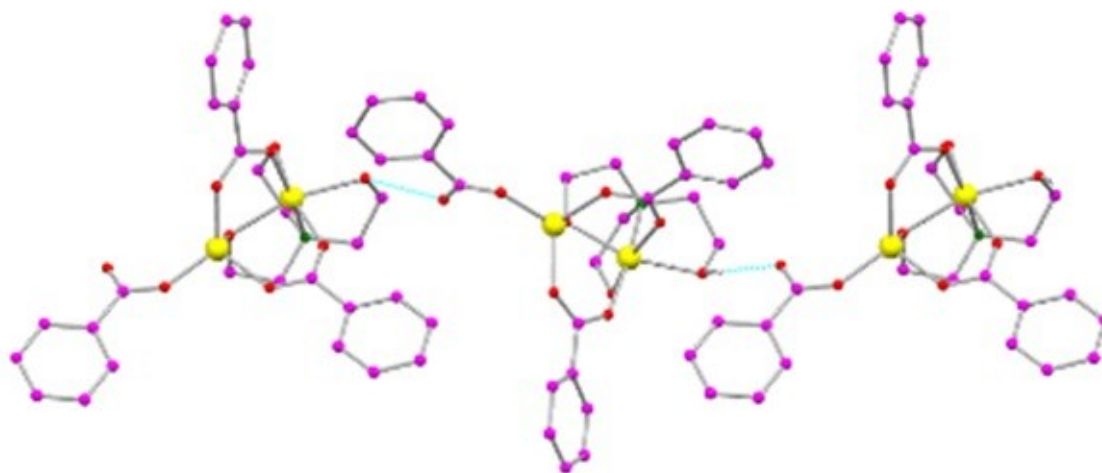

**Fig. S15.** 1 D polymeric chain formed by non-covalent interactions in **2**.

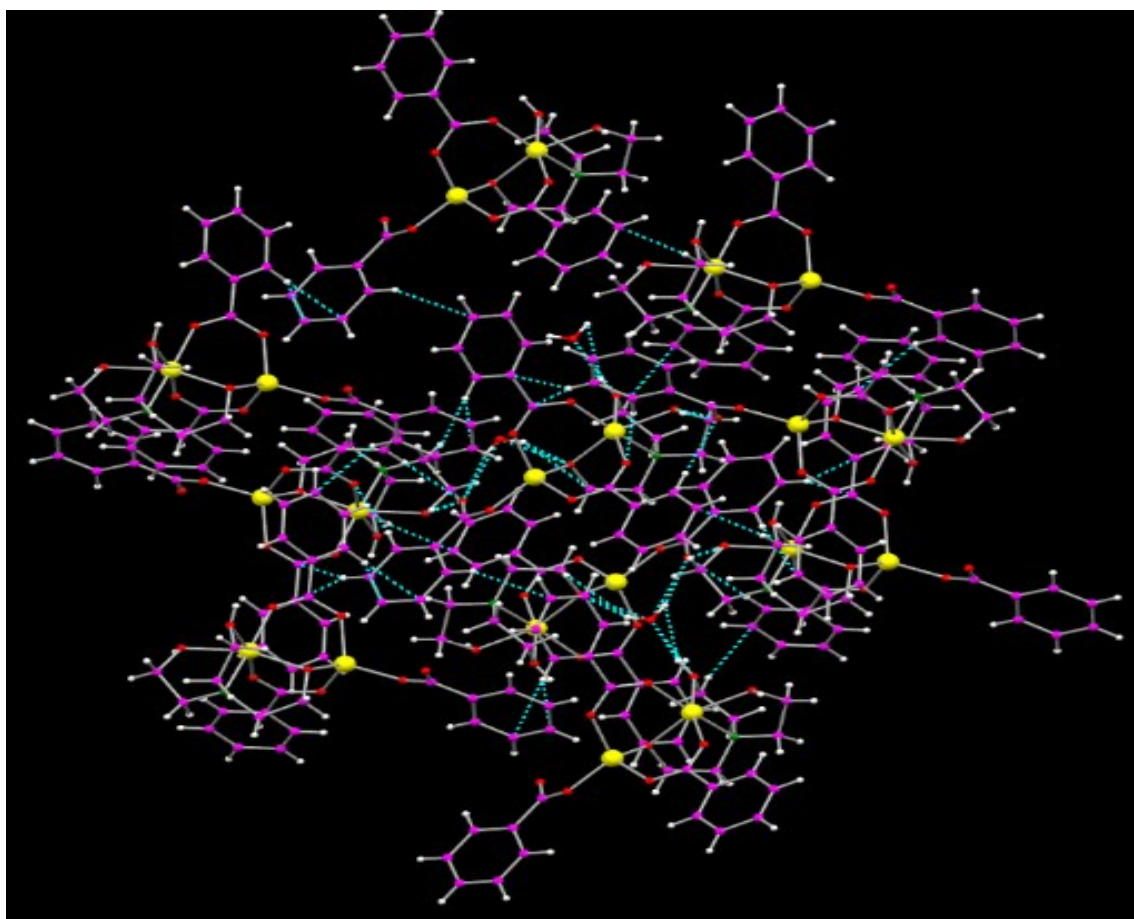

**Fig. S16.** 3 D supramolecular network of **2**.



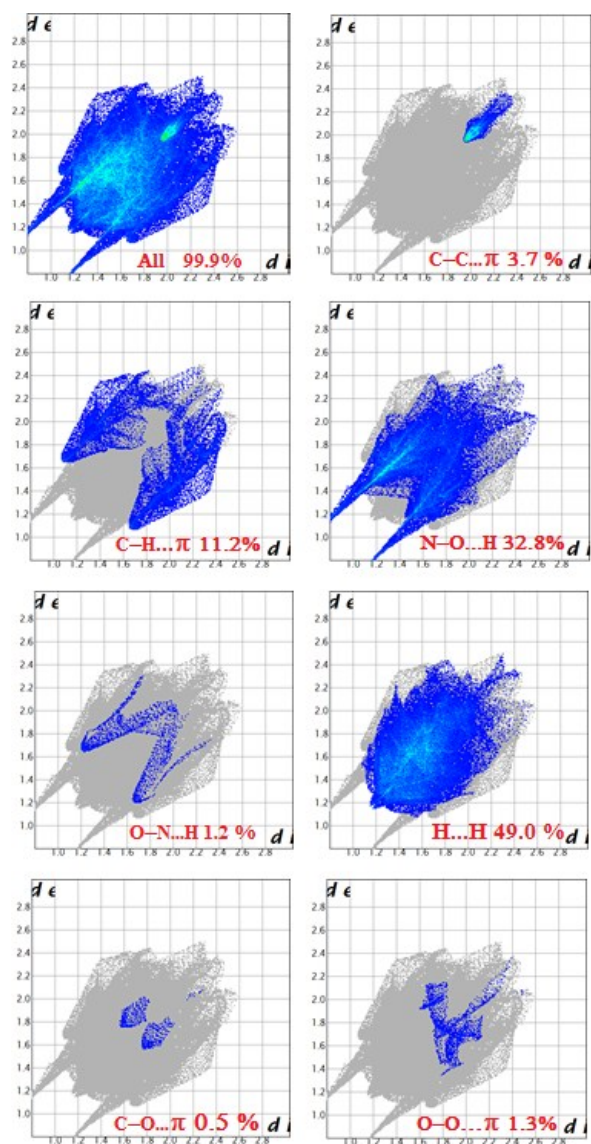

Fig. S17(a). 2D-fingerprint plots of 1 showing different interactions.

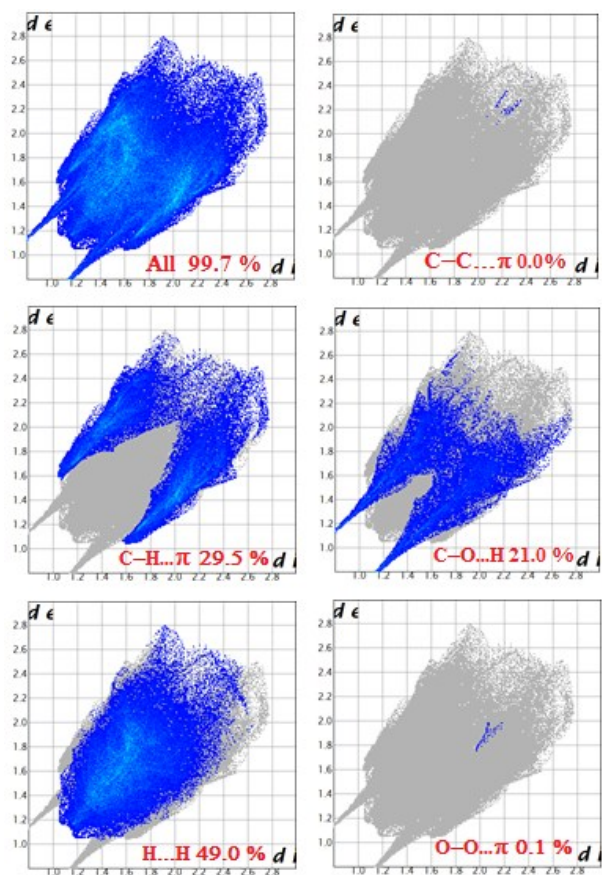

**Fig. S17(b).** 2D-fingerprint plots of **2** showing different interactions.

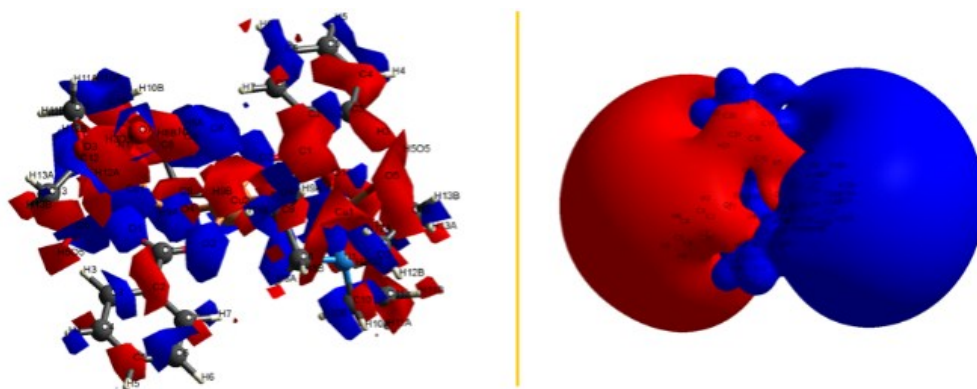

**Fig. S18.** 3D-deformation density map for **1** (left) and **2** (right) showing the presence of CD regions (in red) and CC regions (in blue), mapped using Crystal Explorer 3.1. The iso surfaces are drawn at  $0.008 \text{ eau}^{-3}$ .

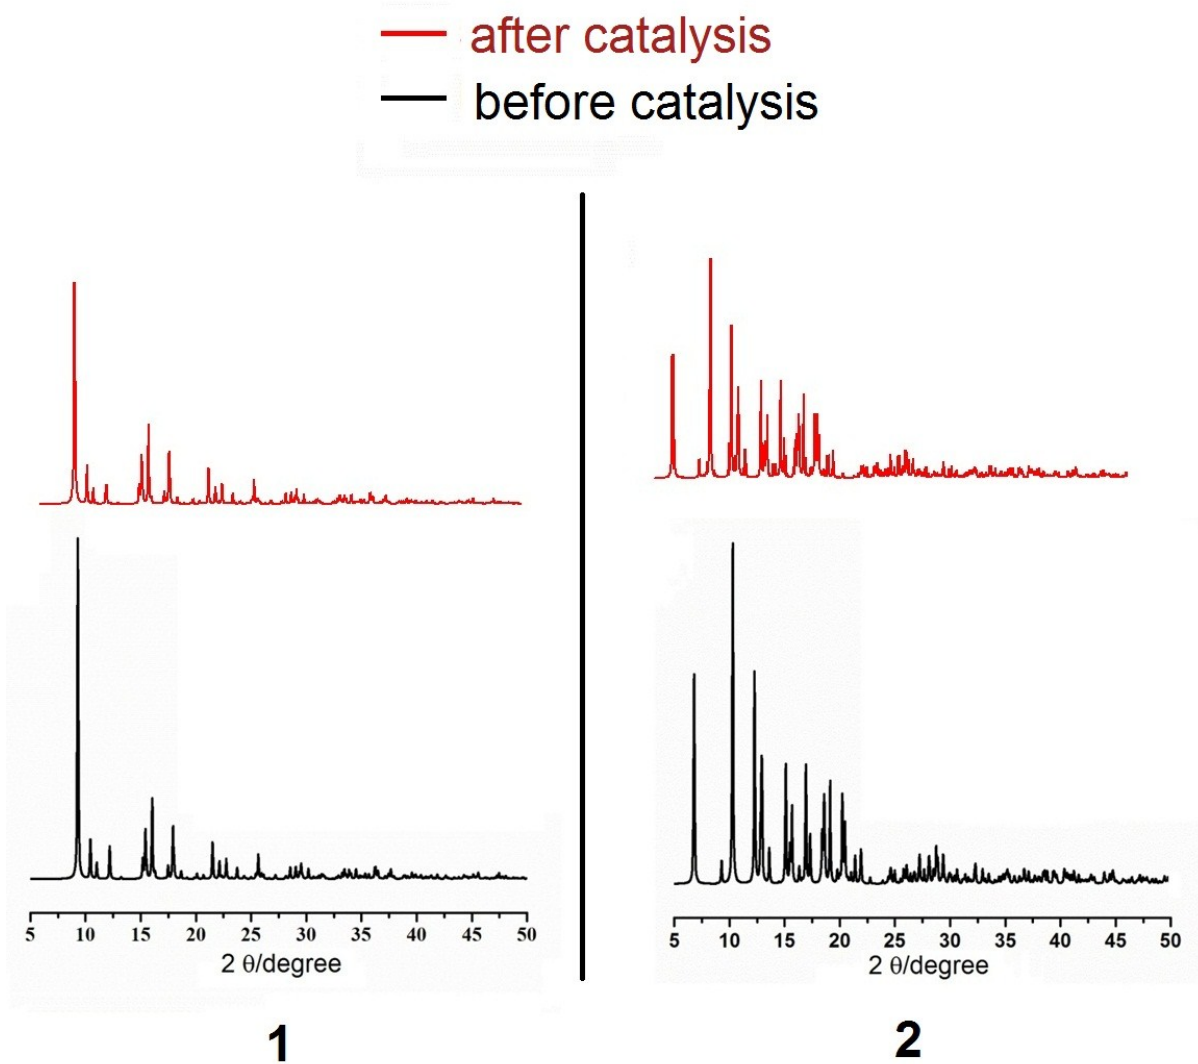

**Fig. S19.** PXRD patterns of **1** and **2** before and after catalytic cycle (The pattern remains the same before and after the catalysis indicating that the composition of the catalysts does not change after the catalytic reactions).
